# Supplementary material for: Diagnostic Performance and Usability of the Genedrive® HCV ID Kit in Two Decentralized Settings in Cameroon and Georgia
Source: MDPI journal article supplement (doi:10.3390/diagnostics11050746), 2021-04-22
Supplement: s1 [file s1]

## Supplementary Material Table S1: Detailed Genedrive System Usability Scale Questionnaire

### Questionnaire part 1: Genedrive® System Usability Scale designed by Genedrive

1. 'I received sufficient training on how to use the Genedrive® and Genedrive® HCV ID Kit.'

|       | Strongly Disagree        | Disagree                 | Neutral                  | Agree                    | Strongly agree                      |
|-------|--------------------------|--------------------------|--------------------------|--------------------------|-------------------------------------|
| CMR A | <input type="checkbox"/> | <input type="checkbox"/> | <input type="checkbox"/> | <input type="checkbox"/> | <input checked="" type="checkbox"/> |
| CMR B | <input type="checkbox"/> | <input type="checkbox"/> | <input type="checkbox"/> | <input type="checkbox"/> | <input checked="" type="checkbox"/> |
| CMR C | <input type="checkbox"/> | <input type="checkbox"/> | <input type="checkbox"/> | <input type="checkbox"/> | <input checked="" type="checkbox"/> |
| GEO A | <input type="checkbox"/> | <input type="checkbox"/> | <input type="checkbox"/> | <input type="checkbox"/> | <input checked="" type="checkbox"/> |
| GEO B | <input type="checkbox"/> | <input type="checkbox"/> | <input type="checkbox"/> | <input type="checkbox"/> | <input checked="" type="checkbox"/> |

2. 'Overall, I found the Genedrive® and Genedrive® HCV ID Kit easy to use within my laboratory.'

|       | Strongly Disagree        | Disagree                 | Neutral                  | Agree                               | Strongly agree                      |
|-------|--------------------------|--------------------------|--------------------------|-------------------------------------|-------------------------------------|
| CMR A | <input type="checkbox"/> | <input type="checkbox"/> | <input type="checkbox"/> | <input checked="" type="checkbox"/> | <input type="checkbox"/>            |
| CMR B | <input type="checkbox"/> | <input type="checkbox"/> | <input type="checkbox"/> | <input type="checkbox"/>            | <input checked="" type="checkbox"/> |
| CMR C | <input type="checkbox"/> | <input type="checkbox"/> | <input type="checkbox"/> | <input checked="" type="checkbox"/> | <input type="checkbox"/>            |
| GEO A | <input type="checkbox"/> | <input type="checkbox"/> | <input type="checkbox"/> | <input checked="" type="checkbox"/> | <input type="checkbox"/>            |
| GEO B | <input type="checkbox"/> | <input type="checkbox"/> | <input type="checkbox"/> | <input checked="" type="checkbox"/> | <input type="checkbox"/>            |

3. 'I found all elements of the testing procedure easy to carry out' Choose an item.

|       | Strongly Disagree                   | Disagree                 | Neutral                             | Agree                               | Strongly agree                      |
|-------|-------------------------------------|--------------------------|-------------------------------------|-------------------------------------|-------------------------------------|
| CMR A | <input checked="" type="checkbox"/> | <input type="checkbox"/> | <input type="checkbox"/>            | <input type="checkbox"/>            | <input type="checkbox"/>            |
| CMR B | <input type="checkbox"/>            | <input type="checkbox"/> | <input type="checkbox"/>            | <input type="checkbox"/>            | <input checked="" type="checkbox"/> |
| CMR C | <input type="checkbox"/>            | <input type="checkbox"/> | <input type="checkbox"/>            | <input checked="" type="checkbox"/> | <input type="checkbox"/>            |
| GEO A | <input type="checkbox"/>            | <input type="checkbox"/> | <input checked="" type="checkbox"/> | <input type="checkbox"/>            | <input type="checkbox"/>            |
| GEO B | <input type="checkbox"/>            | <input type="checkbox"/> | <input checked="" type="checkbox"/> | <input type="checkbox"/>            | <input type="checkbox"/>            |

4. 'I did not experience any technical problems when using the equipment' Choose an item.

|       | Strongly Disagree        | Disagree                            | Neutral                  | Agree                    | Strongly agree           |
|-------|--------------------------|-------------------------------------|--------------------------|--------------------------|--------------------------|
| CMR A | <input type="checkbox"/> | <input checked="" type="checkbox"/> | <input type="checkbox"/> | <input type="checkbox"/> | <input type="checkbox"/> |
| CMR B | <input type="checkbox"/> | <input checked="" type="checkbox"/> | <input type="checkbox"/> | <input type="checkbox"/> | <input type="checkbox"/> |
| CMR C | <input type="checkbox"/> | <input checked="" type="checkbox"/> | <input type="checkbox"/> | <input type="checkbox"/> | <input type="checkbox"/> |
| GEO A | <input type="checkbox"/> | <input checked="" type="checkbox"/> | <input type="checkbox"/> | <input type="checkbox"/> | <input type="checkbox"/> |
| GEO B | <input type="checkbox"/> | <input checked="" type="checkbox"/> | <input type="checkbox"/> | <input type="checkbox"/> | <input type="checkbox"/> |

If you answered 1 – Strongly Disagree or 2 Disagree, how were these dealt with?

- Indeterminate retest or control failed retest (Georgia)
- When we print results there are two labels coming out
- Power cord for the printers are not holding very well, sometimes we have to hold them before printing
- We had the labels rolling on itself when printing and it was not easy to remove
- It is a bit fastidious to fix the canal on the cartridge, it need a bit of physical effort

- *We had issue with machine 02 that sometimes didn't recognize the printer, sometimes it sees the printer but refuse to print*

5. 'I found the on board Genedrive® software easy to navigate and interpret' Choose an item.

|       | Strongly Disagree        | Disagree                 | Neutral                             | Agree                               | Strongly agree           |
|-------|--------------------------|--------------------------|-------------------------------------|-------------------------------------|--------------------------|
| CMR A | <input type="checkbox"/> | <input type="checkbox"/> | <input checked="" type="checkbox"/> | <input type="checkbox"/>            | <input type="checkbox"/> |
| CMR B | <input type="checkbox"/> | <input type="checkbox"/> | <input type="checkbox"/>            | <input checked="" type="checkbox"/> | <input type="checkbox"/> |
| CMR C | <input type="checkbox"/> | <input type="checkbox"/> | <input type="checkbox"/>            | <input checked="" type="checkbox"/> | <input type="checkbox"/> |
| GEO A | <input type="checkbox"/> | <input type="checkbox"/> | <input type="checkbox"/>            | <input checked="" type="checkbox"/> | <input type="checkbox"/> |
| GEO B | <input type="checkbox"/> | <input type="checkbox"/> | <input type="checkbox"/>            | <input checked="" type="checkbox"/> | <input type="checkbox"/> |

6. 'The packaging for the Genedrive® HCV ID Kit was fit for purpose' Choose an item.

|       | Strongly Disagree                   | Disagree                 | Neutral                  | Agree                               | Strongly agree                      |
|-------|-------------------------------------|--------------------------|--------------------------|-------------------------------------|-------------------------------------|
| CMR A | <input type="checkbox"/>            | <input type="checkbox"/> | <input type="checkbox"/> | <input checked="" type="checkbox"/> | <input type="checkbox"/>            |
| CMR B | <input type="checkbox"/>            | <input type="checkbox"/> | <input type="checkbox"/> | <input checked="" type="checkbox"/> | <input type="checkbox"/>            |
| CMR C | <input type="checkbox"/>            | <input type="checkbox"/> | <input type="checkbox"/> | <input checked="" type="checkbox"/> | <input type="checkbox"/>            |
| GEO A | <input type="checkbox"/>            | <input type="checkbox"/> | <input type="checkbox"/> | <input type="checkbox"/>            | <input checked="" type="checkbox"/> |
| GEO B | <input checked="" type="checkbox"/> | <input type="checkbox"/> | <input type="checkbox"/> | <input type="checkbox"/>            | <input type="checkbox"/>            |

If you answered 1 – Strongly Disagree or 2 – Agree, how do you think the packaging could be improved?

7. 'I would continue to use Genedrive® within my laboratory for HCV testing'

|       | Strongly Disagree        | Disagree                 | Neutral                  | Agree                               | Strongly agree           |
|-------|--------------------------|--------------------------|--------------------------|-------------------------------------|--------------------------|
| CMR A | <input type="checkbox"/> | <input type="checkbox"/> | <input type="checkbox"/> | <input checked="" type="checkbox"/> | <input type="checkbox"/> |
| CMR B | <input type="checkbox"/> | <input type="checkbox"/> | <input type="checkbox"/> | <input checked="" type="checkbox"/> | <input type="checkbox"/> |
| CMR C | <input type="checkbox"/> | <input type="checkbox"/> | <input type="checkbox"/> | <input checked="" type="checkbox"/> | <input type="checkbox"/> |
| GEO A | <input type="checkbox"/> | <input type="checkbox"/> | <input type="checkbox"/> | <input checked="" type="checkbox"/> | <input type="checkbox"/> |
| GEO B | <input type="checkbox"/> | <input type="checkbox"/> | <input type="checkbox"/> | <input checked="" type="checkbox"/> | <input type="checkbox"/> |

If agree or strongly agree, why?

- The system is less cumbersome and the method is well design and easy to learn
- The system for me doesn't have to be connected to a computer, it works very well and the screen is well readable. If we could launch several tests at the same time on one machine, it would be good as the reading time for one sample is relatively long
- A training is really necessary before using the machine, it is true the instruction is clear but technical assistance is required for the first use.

8. It's effective and straightforward, as well as convenient to use just one machine that can connect directly to the computer.

|       | Strongly Disagree        | Disagree                 | Neutral                  | Agree                               | Strongly agree                      |
|-------|--------------------------|--------------------------|--------------------------|-------------------------------------|-------------------------------------|
| CMR A | <input type="checkbox"/> | <input type="checkbox"/> | <input type="checkbox"/> | <input type="checkbox"/>            | <input checked="" type="checkbox"/> |
| CMR B | <input type="checkbox"/> | <input type="checkbox"/> | <input type="checkbox"/> | <input checked="" type="checkbox"/> | <input type="checkbox"/>            |
| CMR C | <input type="checkbox"/> | <input type="checkbox"/> | <input type="checkbox"/> | <input type="checkbox"/>            | <input checked="" type="checkbox"/> |
| GEO A | <input type="checkbox"/> | <input type="checkbox"/> | <input type="checkbox"/> | <input checked="" type="checkbox"/> | <input type="checkbox"/>            |
| GEO B | <input type="checkbox"/> | <input type="checkbox"/> | <input type="checkbox"/> | <input checked="" type="checkbox"/> | <input type="checkbox"/>            |

**Questionnaire part 2:** from <https://www.usability.gov/>

1. I think that I would like to use this system frequently.

|       | Strongly Disagree        | Disagree                 | Neutral                             | Agree                               | Strongly agree                      |
|-------|--------------------------|--------------------------|-------------------------------------|-------------------------------------|-------------------------------------|
| CMR A | <input type="checkbox"/> | <input type="checkbox"/> | <input checked="" type="checkbox"/> | <input type="checkbox"/>            | <input type="checkbox"/>            |
| CMR B | <input type="checkbox"/> | <input type="checkbox"/> | <input type="checkbox"/>            | <input type="checkbox"/>            | <input checked="" type="checkbox"/> |
| CMR C | <input type="checkbox"/> | <input type="checkbox"/> | <input type="checkbox"/>            | <input checked="" type="checkbox"/> | <input type="checkbox"/>            |
| GEO A | <input type="checkbox"/> | <input type="checkbox"/> | <input checked="" type="checkbox"/> | <input type="checkbox"/>            | <input type="checkbox"/>            |
| GEO B | <input type="checkbox"/> | <input type="checkbox"/> | <input checked="" type="checkbox"/> | <input type="checkbox"/>            | <input type="checkbox"/>            |

2. I found the system unnecessarily complex.

|       | Strongly Disagree                   | Disagree                            | Neutral                  | Agree                               | Strongly agree           |
|-------|-------------------------------------|-------------------------------------|--------------------------|-------------------------------------|--------------------------|
| CMR A | <input type="checkbox"/>            | <input checked="" type="checkbox"/> | <input type="checkbox"/> | <input type="checkbox"/>            | <input type="checkbox"/> |
| CMR B | <input checked="" type="checkbox"/> | <input type="checkbox"/>            | <input type="checkbox"/> | <input type="checkbox"/>            | <input type="checkbox"/> |
| CMR C | <input type="checkbox"/>            | <input checked="" type="checkbox"/> | <input type="checkbox"/> | <input type="checkbox"/>            | <input type="checkbox"/> |
| GEO A | <input type="checkbox"/>            | <input checked="" type="checkbox"/> | <input type="checkbox"/> | <input type="checkbox"/>            | <input type="checkbox"/> |
| GEO B | <input type="checkbox"/>            | <input type="checkbox"/>            | <input type="checkbox"/> | <input checked="" type="checkbox"/> | <input type="checkbox"/> |

3. I thought the system was easy to use.

|       | Strongly Disagree        | Disagree                 | Neutral                  | Agree                               | Strongly agree                      |
|-------|--------------------------|--------------------------|--------------------------|-------------------------------------|-------------------------------------|
| CMR A | <input type="checkbox"/> | <input type="checkbox"/> | <input type="checkbox"/> | <input type="checkbox"/>            | <input checked="" type="checkbox"/> |
| CMR B | <input type="checkbox"/> | <input type="checkbox"/> | <input type="checkbox"/> | <input type="checkbox"/>            | <input checked="" type="checkbox"/> |
| CMR C | <input type="checkbox"/> | <input type="checkbox"/> | <input type="checkbox"/> | <input type="checkbox"/>            | <input checked="" type="checkbox"/> |
| GEO A | <input type="checkbox"/> | <input type="checkbox"/> | <input type="checkbox"/> | <input checked="" type="checkbox"/> | <input type="checkbox"/>            |
| GEO B | <input type="checkbox"/> | <input type="checkbox"/> | <input type="checkbox"/> | <input checked="" type="checkbox"/> | <input type="checkbox"/>            |

4. I think that I would need the support of a technical person to be able to use this system.

|       | Strongly Disagree                   | Disagree                            | Neutral                  | Agree                               | Strongly agree           |
|-------|-------------------------------------|-------------------------------------|--------------------------|-------------------------------------|--------------------------|
| CMR A | <input checked="" type="checkbox"/> | <input type="checkbox"/>            | <input type="checkbox"/> | <input type="checkbox"/>            | <input type="checkbox"/> |
| CMR B | <input type="checkbox"/>            | <input checked="" type="checkbox"/> | <input type="checkbox"/> | <input type="checkbox"/>            | <input type="checkbox"/> |
| CMR C | <input type="checkbox"/>            | <input checked="" type="checkbox"/> | <input type="checkbox"/> | <input type="checkbox"/>            | <input type="checkbox"/> |
| GEO A | <input type="checkbox"/>            | <input type="checkbox"/>            | <input type="checkbox"/> | <input checked="" type="checkbox"/> | <input type="checkbox"/> |
| GEO B | <input type="checkbox"/>            | <input type="checkbox"/>            | <input type="checkbox"/> | <input checked="" type="checkbox"/> | <input type="checkbox"/> |

5. I found the various functions in this system were well integrated.

|       | Strongly Disagree        | Disagree                            | Neutral                  | Agree                               | Strongly agree           |
|-------|--------------------------|-------------------------------------|--------------------------|-------------------------------------|--------------------------|
| CMR A | <input type="checkbox"/> | <input checked="" type="checkbox"/> | <input type="checkbox"/> | <input type="checkbox"/>            | <input type="checkbox"/> |
| CMR B | <input type="checkbox"/> | <input type="checkbox"/>            | <input type="checkbox"/> | <input checked="" type="checkbox"/> | <input type="checkbox"/> |
| CMR C | <input type="checkbox"/> | <input checked="" type="checkbox"/> | <input type="checkbox"/> | <input type="checkbox"/>            | <input type="checkbox"/> |
| GEO A | <input type="checkbox"/> | <input type="checkbox"/>            | <input type="checkbox"/> | <input checked="" type="checkbox"/> | <input type="checkbox"/> |
| GEO B | <input type="checkbox"/> | <input type="checkbox"/>            | <input type="checkbox"/> | <input checked="" type="checkbox"/> | <input type="checkbox"/> |

6. I thought there was too much inconsistency in this system.

|  | Strongly Disagree | Disagree | Neutral | Agree | Strongly agree |
|--|-------------------|----------|---------|-------|----------------|
|--|-------------------|----------|---------|-------|----------------|

|       |                          |                                     |                          |                          |                          |
|-------|--------------------------|-------------------------------------|--------------------------|--------------------------|--------------------------|
| CMR A | <input type="checkbox"/> | <input checked="" type="checkbox"/> | <input type="checkbox"/> | <input type="checkbox"/> | <input type="checkbox"/> |
| CMR B | <input type="checkbox"/> | <input checked="" type="checkbox"/> | <input type="checkbox"/> | <input type="checkbox"/> | <input type="checkbox"/> |
| CMR C | <input type="checkbox"/> | <input checked="" type="checkbox"/> | <input type="checkbox"/> | <input type="checkbox"/> | <input type="checkbox"/> |
| GEO A | <input type="checkbox"/> | <input checked="" type="checkbox"/> | <input type="checkbox"/> | <input type="checkbox"/> | <input type="checkbox"/> |
| GEO B | <input type="checkbox"/> | <input checked="" type="checkbox"/> | <input type="checkbox"/> | <input type="checkbox"/> | <input type="checkbox"/> |

7. I would imagine that most people would learn to use this system very quickly.

|       | Strongly Disagree        | Disagree                 | Neutral                  | Agree                               | Strongly agree                      |
|-------|--------------------------|--------------------------|--------------------------|-------------------------------------|-------------------------------------|
| CMR A | <input type="checkbox"/> | <input type="checkbox"/> | <input type="checkbox"/> | <input checked="" type="checkbox"/> | <input type="checkbox"/>            |
| CMR B | <input type="checkbox"/> | <input type="checkbox"/> | <input type="checkbox"/> | <input checked="" type="checkbox"/> | <input type="checkbox"/>            |
| CMR C | <input type="checkbox"/> | <input type="checkbox"/> | <input type="checkbox"/> | <input checked="" type="checkbox"/> | <input type="checkbox"/>            |
| GEO A | <input type="checkbox"/> | <input type="checkbox"/> | <input type="checkbox"/> | <input type="checkbox"/>            | <input checked="" type="checkbox"/> |
| GEO B | <input type="checkbox"/> | <input type="checkbox"/> | <input type="checkbox"/> | <input type="checkbox"/>            | <input checked="" type="checkbox"/> |

8. I found the system very cumbersome to use.

|       | Strongly Disagree                   | Disagree                 | Neutral                  | Agree                    | Strongly agree           |
|-------|-------------------------------------|--------------------------|--------------------------|--------------------------|--------------------------|
| CMR A | <input checked="" type="checkbox"/> | <input type="checkbox"/> | <input type="checkbox"/> | <input type="checkbox"/> | <input type="checkbox"/> |
| CMR B | <input checked="" type="checkbox"/> | <input type="checkbox"/> | <input type="checkbox"/> | <input type="checkbox"/> | <input type="checkbox"/> |
| CMR C | <input checked="" type="checkbox"/> | <input type="checkbox"/> | <input type="checkbox"/> | <input type="checkbox"/> | <input type="checkbox"/> |
| GEO A | <input checked="" type="checkbox"/> | <input type="checkbox"/> | <input type="checkbox"/> | <input type="checkbox"/> | <input type="checkbox"/> |
| GEO B | <input checked="" type="checkbox"/> | <input type="checkbox"/> | <input type="checkbox"/> | <input type="checkbox"/> | <input type="checkbox"/> |

9. I felt very confident using the system.

|       | Strongly Disagree        | Disagree                 | Neutral                  | Agree                               | Strongly agree           |
|-------|--------------------------|--------------------------|--------------------------|-------------------------------------|--------------------------|
| CMR A | <input type="checkbox"/> | <input type="checkbox"/> | <input type="checkbox"/> | <input checked="" type="checkbox"/> | <input type="checkbox"/> |
| CMR B | <input type="checkbox"/> | <input type="checkbox"/> | <input type="checkbox"/> | <input checked="" type="checkbox"/> | <input type="checkbox"/> |
| CMR C | <input type="checkbox"/> | <input type="checkbox"/> | <input type="checkbox"/> | <input checked="" type="checkbox"/> | <input type="checkbox"/> |
| GEO A | <input type="checkbox"/> | <input type="checkbox"/> | <input type="checkbox"/> | <input checked="" type="checkbox"/> | <input type="checkbox"/> |
| GEO B | <input type="checkbox"/> | <input type="checkbox"/> | <input type="checkbox"/> | <input checked="" type="checkbox"/> | <input type="checkbox"/> |

10. I needed to learn a lot of things before I could get going with this system.

|       | Strongly Disagree        | Disagree                 | Neutral                             | Agree                               | Strongly agree           |
|-------|--------------------------|--------------------------|-------------------------------------|-------------------------------------|--------------------------|
| CMR A | <input type="checkbox"/> | <input type="checkbox"/> | <input type="checkbox"/>            | <input checked="" type="checkbox"/> | <input type="checkbox"/> |
| CMR B | <input type="checkbox"/> | <input type="checkbox"/> | <input type="checkbox"/>            | <input checked="" type="checkbox"/> | <input type="checkbox"/> |
| CMR C | <input type="checkbox"/> | <input type="checkbox"/> | <input type="checkbox"/>            | <input checked="" type="checkbox"/> | <input type="checkbox"/> |
| GEO A | <input type="checkbox"/> | <input type="checkbox"/> | <input checked="" type="checkbox"/> | <input type="checkbox"/>            | <input type="checkbox"/> |
| GEO B | <input type="checkbox"/> | <input type="checkbox"/> | <input checked="" type="checkbox"/> | <input type="checkbox"/>            | <input type="checkbox"/> |
